# Supplementary material for: A Machine Learning-Driven Virtual Biopsy System For Kidney Transplant Patients
Source: PubMed Central journal article supplement (PMC10791605; doi:10.1038/s41467-023-44595-z), 2024-01-16
Supplement: 41467_2023_44595_MOESM3_ESM.pdf [file 41467_2023_44595_MOESM3_ESM.pdf]

**File name: Supplementary Movie 1**

**Description:** Virtual Biopsy System application. Available online:

[https://transplantpredictionsystem.shinyapps.io/Virtual Biopsy System](https://transplantpredictionsystem.shinyapps.io/Virtual_Biopsy_System)
